# Supplementary material for: Systemic Sclerosis and Cardiovascular Disease-related Mortality in the United States: An Analysis of Trends and Disparities, 1999-2022
Source: Research Square preprint supplement (doi:10.21203/rs.3.rs-7323176/v1), 2025-09-29

**Supplemental Material:**

**Supplemental Table 1.** Systemic Sclerosis and CVD-related crude number of deaths in the US population stratified by sex, race, region, age group, census region, and urbanization status in the United States.

| Year | All SS deaths | SS+CVD deaths | Female | Male | NH Black or African American | NH White | Hispanics | Young (15-44) | Middle age (45-74) | Elderly (≥75) | Northeast | Midwest | South | West |
| --- | --- | --- | --- | --- | --- | --- | --- | --- | --- | --- | --- | --- | --- | --- |
| 1999 | 1938 | 1165 | 957 | 208 | 173 | 877 | 87 | 99 | 729 | 337 | 243 | 246 | 436 | 240 |
| 2000 | 1944 | 1046 | 816 | 230 | 171 | 783 | 67 | 83 | 615 | 348 | 241 | 226 | 379 | 200 |
| 2001 | 1973 | 1063 | 887 | 176 | 159 | 794 | 82 | 100 | 631 | 332 | 231 | 268 | 357 | 207 |
| 2002 | 1922 | 1017 | 809 | 208 | 165 | 743 | 77 | 80 | 600 | 337 | 218 | 219 | 347 | 233 |
| 2003 | 1943 | 1128 | 915 | 213 | 157 | 854 | 85 | 90 | 702 | 336 | 243 | 234 | 384 | 267 |
| 2004 | 1873 | 1117 | 914 | 203 | 165 | 833 | 87 | 83 | 660 | 374 | 242 | 272 | 387 | 216 |
| 2005 | 1961 | 1167 | 954 | 213 | 194 | 816 | 120 | 88 | 711 | 368 | 226 | 244 | 431 | 266 |
| 2006 | 1803 | 1087 | 888 | 199 | 159 | 815 | 88 | 75 | 662 | 350 | 235 | 253 | 366 | 233 |
| 2007 | 1836 | 1135 | 915 | 220 | 163 | 854 | 92 | 74 | 686 | 375 | 245 | 259 | 417 | 214 |
| 2008 | 1798 | 1081 | 891 | 190 | 161 | 793 | 87 | 89 | 627 | 365 | 218 | 251 | 373 | 239 |
| 2009 | 1807 | 1090 | 909 | 181 | 174 | 805 | 80 | 69 | 668 | 353 | 201 | 265 | 373 | 251 |
| 2010 | 1753 | 1098 | 895 | 203 | 189 | 785 | 94 | 77 | 667 | 354 | 223 | 266 | 385 | 224 |
| 2011 | 1732 | 1085 | 893 | 192 | 138 | 801 | 111 | 71 | 660 | 354 | 243 | 252 | 329 | 261 |
| 2012 | 1714 | 1014 | 818 | 196 | 152 | 710 | 114 | 60 | 611 | 343 | 209 | 215 | 343 | 247 |
| 2013 | 1807 | 1080 | 891 | 189 | 143 | 797 | 95 | 62 | 643 | 375 | 208 | 234 | 387 | 251 |
| 2014 | 1726 | 1021 | 832 | 189 | 160 | 708 | 112 | 66 | 632 | 323 | 208 | 218 | 345 | 250 |
| 2015 | 1702 | 1019 | 826 | 193 | 137 | 753 | 89 | 44 | 619 | 356 | 207 | 240 | 317 | 255 |
| 2016 | 1643 | 1023 | 832 | 191 | 172 | 705 | 107 | 49 | 660 | 314 | 222 | 224 | 342 | 235 |
| 2017 | 1681 | 1017 | 842 | 175 | 174 | 723 | 78 | 71 | 592 | 354 | 194 | 222 | 345 | 256 |
| 2018 | 1605 | 1007 | 816 | 191 | 168 | 672 | 116 | 61 | 609 | 337 | 203 | 220 | 345 | 239 |
| 2019 | 1635 | 1037 | 824 | 213 | 139 | 716 | 137 | 45 | 618 | 374 | 195 | 247 | 346 | 249 |
| 2020 | 1667 | 1095 | 890 | 205 | 168 | 762 | 110 | 66 | 631 | 398 | 211 | 250 | 394 | 240 |
| 2021 | 1748 | 1184 | 989 | 195 | 161 | 826 | 148 | 60 | 692 | 432 | 222 | 275 | 419 | 268 |
| 2022 | 1799 | 1189 | 951 | 238 | 161 | 826 | 145 | 53 | 663 | 473 | 220 | 265 | 403 | 301 |
| Total | 43010 | 25965 | 21154 | 4811 | 3903 | 18751 | 2408 | 1715 | 15588 | 8662 | 5308 | 5865 | 8950 | 5842 |

**Supplemental Table 2.** Systemic Sclerosis and CVD-related mortality rates stratified by sex, race, and age in the United States.

| Year | Overall (SS+CVD) | Women | Men | NH Black or African American | NH White | Hispanics | Young  (15-44) | Middle age (45-74) | Elderly (≥75) |
| --- | --- | --- | --- | --- | --- | --- | --- | --- | --- |
| 1999 | 5.39 | 7.99 | 2.17 | 8.04 | 4.99 | 6.88 | 0.78 | 9.19 | 20.59 |
| 2000 | 4.79 | 6.71 | 2.39 | 7.79 | 4.37 | 4.86 | 0.67 | 7.66 | 20.95 |
| 2001 | 4.79 | 7.21 | 1.75 | 6.99 | 4.44 | 5.49 | 0.81 | 7.72 | 19.59 |
| 2002 | 4.51 | 6.45 | 2.01 | 7.37 | 4.07 | 5.12 | 0.67 | 7.17 | 19.68 |
| 2003 | 4.91 | 7.22 | 2.04 | 6.53 | 4.65 | 4.86 | 0.75 | 8.21 | 19.35 |
| 2004 | 4.77 | 7.08 | 1.87 | 6.84 | 4.45 | 4.84 | 0.68 | 7.5 | 21.38 |
| 2005 | 4.9 | 7.28 | 1.92 | 7.92 | 4.29 | 6.79 | 0.71 | 7.93 | 20.77 |
| 2006 | 4.49 | 6.67 | 1.8 | 6.37 | 4.23 | 4.49 | 0.64 | 7.16 | 19.57 |
| 2007 | 4.6 | 6.71 | 1.95 | 6.1 | 4.4 | 4.95 | 0.64 | 7.22 | 20.79 |
| 2008 | 4.34 | 6.48 | 1.62 | 6.12 | 4.01 | 3.97 | 0.78 | 6.45 | 20.03 |
| 2009 | 4.24 | 6.5 | 1.5 | 6.26 | 4.02 | 3.62 | 0.57 | 6.65 | 19.38 |
| 2010 | 4.21 | 6.25 | 1.65 | 6.73 | 3.86 | 3.97 | 0.67 | 6.5 | 18.97 |
| 2011 | 4.09 | 6.12 | 1.53 | 4.89 | 3.89 | 4.57 | 0.64 | 6.26 | 18.64 |
| 2012 | 3.72 | 5.48 | 1.54 | 5.13 | 3.36 | 4.59 | 0.52 | 5.58 | 17.99 |
| 2013 | 3.82 | 5.77 | 1.46 | 4.64 | 3.65 | 3.67 | 0.48 | 5.7 | 19.07 |
| 2014 | 3.59 | 5.37 | 1.43 | 5.33 | 3.21 | 4.12 | 0.57 | 5.5 | 16.34 |
| 2015 | 3.48 | 5.18 | 1.41 | 4.31 | 3.37 | 3.08 | 0.35 | 5.27 | 17.6 |
| 2016 | 3.43 | 5.17 | 1.34 | 5.19 | 3.12 | 3.41 | 0.42 | 5.5 | 15.31 |
| 2017 | 3.37 | 5.16 | 1.21 | 5.41 | 3.15 | 2.53 | 0.6 | 4.77 | 16.72 |
| 2018 | 3.24 | 4.84 | 1.28 | 5.23 | 2.87 | 3.57 | 0.5 | 4.83 | 15.53 |
| 2019 | 3.27 | 4.81 | 1.41 | 4.17 | 3.01 | 4.03 | 0.39 | 4.86 | 16.59 |
| 2020 | 3.41 | 5.08 | 1.41 | 4.99 | 3.17 | 3.22 | 0.52 | 4.9 | 17.25 |
| 2021 | 3.68 | 5.66 | 1.29 | 4.6 | 3.53 | 4.17 | 0.5 | 5.21 | 19.43 |
| 2022 | 3.58 | 5.27 | 1.58 | 4.71 | 3.4 | 3.97 | 0.43 | 4.98 | 19.68 |
| **Average APC** | -1.54* (-2.09 to –1.21) | -1.46* (-2.07 to –1.07) | -1.74* (-2.42 to –1.19) | -2.44* (-3.07 to –1.82) | -1.42* (-2.09 to –1.00) | -1.74 (-3.53 to 0.12) | 2.42* (-3.35 to –1.60) | -2.33* (-3.15 to –1.77) | -0.30 (-1.07 to 0.17) |

**Supplemental Table 3.** Systemic Sclerosis and CVD-related mortality rates stratified by census region and urbanization status in the United States.

| Year | Northeast | Midwest | South | West | Urban | Rural | |
| --- | --- | --- | --- | --- | --- | --- | --- |
| 1999 | 5.47 | 4.88 | 5.68 | 5.47 | 5.51 | 4.87 | |
| 2000 | 5.36 | 4.44 | 4.9 | 4.49 | 4.83 | 4.69 | |
| 2001 | 5.11 | 5.2 | 4.51 | 4.5 | 4.88 | 4.46 | |
| 2002 | 4.78 | 4.2 | 4.29 | 4.97 | 4.62 | 3.96 | |
| 2003 | 5.25 | 4.45 | 4.62 | 5.55 | 4.96 | 4.61 | |
| 2004 | 5.18 | 5.11 | 4.57 | 4.39 | 4.9 | 4.26 | |
| 2005 | 4.81 | 4.48 | 4.96 | 5.32 | 5.05 | 4.28 | |
| 2006 | 4.91 | 4.64 | 4.11 | 4.57 | 4.47 | 4.46 | |
| 2007 | 5.09 | 4.61 | 4.59 | 4.04 | 4.67 | 4.32 | |
| 2008 | 4.54 | 4.53 | 4.01 | 4.43 | 4.38 | 4.12 | |
| 2009 | 4.1 | 4.64 | 3.96 | 4.5 | 4.29 | 4.16 | |
| 2010 | 4.44 | 4.53 | 4 | 3.99 | 4.22 | 4.08 | |
| 2011 | 4.78 | 4.29 | 3.32 | 4.5 | 4.16 | 3.8 | |
| 2012 | 4.02 | 3.55 | 3.37 | 4.1 | 3.72 | 3.57 | |
| 2013 | 3.9 | 3.74 | 3.76 | 4.07 | 3.83 | 3.91 | |
| 2014 | 3.84 | 3.51 | 3.29 | 3.9 | 3.55 | 3.77 | |
| 2015 | 3.78 | 3.74 | 2.95 | 3.91 | 3.51 | 3.39 | |
| 2016 | 3.94 | 3.43 | 3.11 | 3.47 | 3.45 | 3.31 | |
| 2017 | 3.45 | 3.4 | 3.13 | 3.76 | 3.43 | 3.26 | |
| 2018 | 3.58 | 3.3 | 2.93 | 3.4 | 3.28 | 2.99 | |
| 2019 | 3.28 | 3.7 | 2.91 | 3.48 | 3.23 | 3.53 | |
| 2020 | 3.73 | 3.64 | 3.25 | 3.29 | 3.39 | 3.57 | |
| 2021 | 3.82 | 4.02 | 3.43 | 3.67 | - | - |
| 2022 | 3.6 | 3.8 | 3.22 | 3.97 | - | - |
| **Average APC** | -2.02* (-2.50 to -1.59) | -0.83* (-1.31 to -0.21) | -1.94* (-2.71 to -1.36) | -1.73* (-2.36 to -1.10) | -2.40* (-2.76 to -2.02) | -1.74* (-2.19 to -1.28) |

**Supplemental Table 4.** Systemic Sclerosis and CVD-related change in AAMR at the state level in the United States.

| State | AAMR 1999 - 2023 |
| --- | --- |
| Alabama | 2.85 |
| Arizona | 2.98 |
| Arkansas | 3.11 |
| California | 3.34 |
| Colorado | 4.78 |
| Connecticut | 4.60 |
| Delaware | 4.58 |
| District of Columbia | 4.35 |
| Florida | 3.20 |
| Georgia | 3.43 |
| Hawaii | 3.78 |
| Idaho | 3.25 |
| Illinois | 3.46 |
| Indiana | 3.67 |
| Iowa | 3.41 |
| Kansas | 4.39 |
| Kentucky | 3.25 |
| Louisiana | 2.70 |
| Maine | 3.53 |
| Maryland | 4.34 |
| Massachusetts | 4.07 |
| Michigan | 3.79 |
| Minnesota | 4.61 |
| Mississippi | 4.36 |
| Missouri | 3.48 |
| Montana | 4.12 |
| Nebraska | 5.35 |
| Nevada | 4.00 |
| New Hampshire | 2.47 |
| New Jersey | 3.72 |
| New Mexico | 4.43 |
| New York | 3.78 |
| North Carolina | 4.32 |
| North Dakota | 4.62 |
| Ohio | 3.54 |
| Oklahoma | 4.80 |
| Oregon | 3.42 |
| Pennsylvania | 4.00 |
| Rhode Island | 4.73 |
| South Carolina | 4.35 |
| South Dakota | 4.84 |
| Tennessee | 3.76 |
| Texas | 3.75 |
| Utah | 4.46 |
| Vermont | 3.94 |
| Virginia | 3.67 |
| Washington | 4.12 |
| West Virginia | 3.89 |
| Wisconsin | 4.23 |
| Wyoming | 3.68 |

**Supplemental Table 5.** Systemic Sclerosis-related death in the United States by CVD subcategories.

| Year | Hypertensive diseases | Ischemic heart disease | Pulmonary heart disease and diseases of pulmonary circulation | Heart failure | All SSc-related deaths |
| --- | --- | --- | --- | --- | --- |
| 1999 | 114 | 314 | 238 | 284 | 1938 |
| 2000 | 175 | 272 | 125 | 251 | 1944 |
| 2001 | 187 | 282 | 152 | 254 | 1973 |
| 2002 | 156 | 246 | 133 | 246 | 1922 |
| 2003 | 182 | 257 | 331 | 241 | 1943 |
| 2004 | 191 | 237 | 338 | 257 | 1873 |
| 2005 | 180 | 229 | 429 | 246 | 1961 |
| 2006 | 208 | 255 | 379 | 228 | 1803 |
| 2007 | 212 | 236 | 442 | 256 | 1836 |
| 2008 | 174 | 226 | 453 | 223 | 1798 |
| 2009 | 162 | 189 | 479 | 251 | 1807 |
| 2010 | 186 | 215 | 483 | 241 | 1753 |
| 2011 | 187 | 220 | 468 | 237 | 1732 |
| 2012 | 198 | 189 | 399 | 228 | 1714 |
| 2013 | 197 | 186 | 475 | 289 | 1807 |
| 2014 | 172 | 194 | 440 | 252 | 1726 |
| 2015 | 170 | 178 | 436 | 278 | 1702 |
| 2016 | 196 | 172 | 455 | 267 | 1643 |
| 2017 | 189 | 176 | 461 | 286 | 1681 |
| 2018 | 179 | 161 | 470 | 284 | 1605 |
| 2019 | 209 | 169 | 441 | 297 | 1635 |
| 2020 | 236 | 200 | 466 | 319 | 1667 |
| 2021 | 259 | 175 | 524 | 366 | 1748 |
| 2022 | 294 | 208 | 514 | 378 | 1799 |
| Total | 4613 | 5186 | 9531 | 6459 | 43010 |
| Percentage of all SSc deaths (%) | 10.73 | 12.06 | 22.16 | 15.02 | 100 |

**Supplemental Figure 1.** APC for overall and sex-stratified Systemic Sclerosis and CVD-related mortality rates in the adult population of the United States from 1999 to 2022. *Indicates the APC is significantly different from 0.


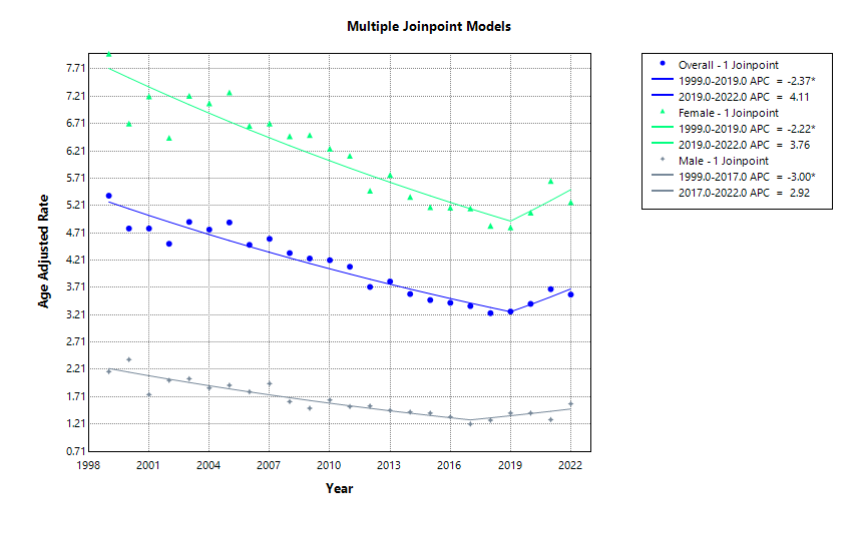


**Supplemental Figure 2.** APC for Race-stratified Systemic Sclerosis and CVD-related mortality rate in the adult population of the United States from 1999 to 2022. *Indicates the APC is significantly different from 0.
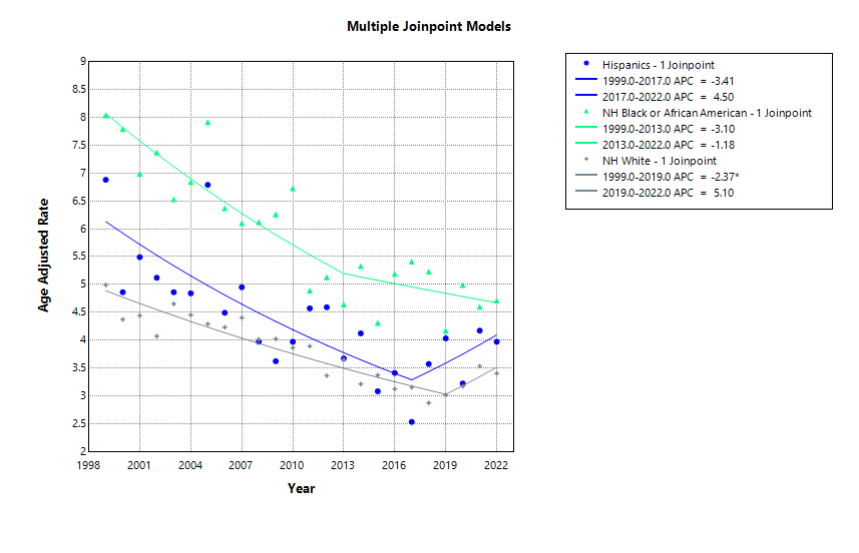


**Supplemental Figure 3.** APC for Age-stratified Systemic Sclerosis and CVD-related mortality rate in the adult population of the United States from 1999 to 2022. *Indicates the APC is significantly different from 0.
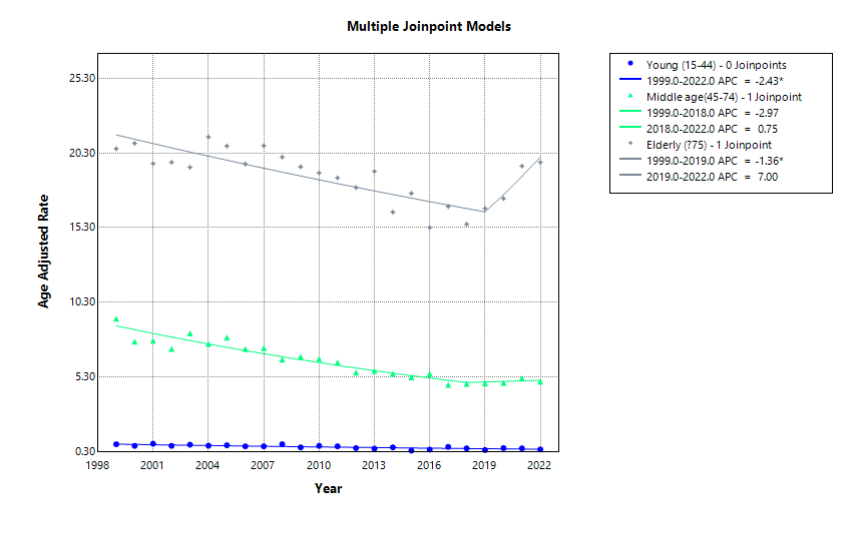


**Supplemental Figure 4.** APC for Census Region-stratified Systemic Sclerosis and CVD-related mortality rate in the adult population of the United States from 1999 to 2022. *Indicates the APC is significantly different from 0.
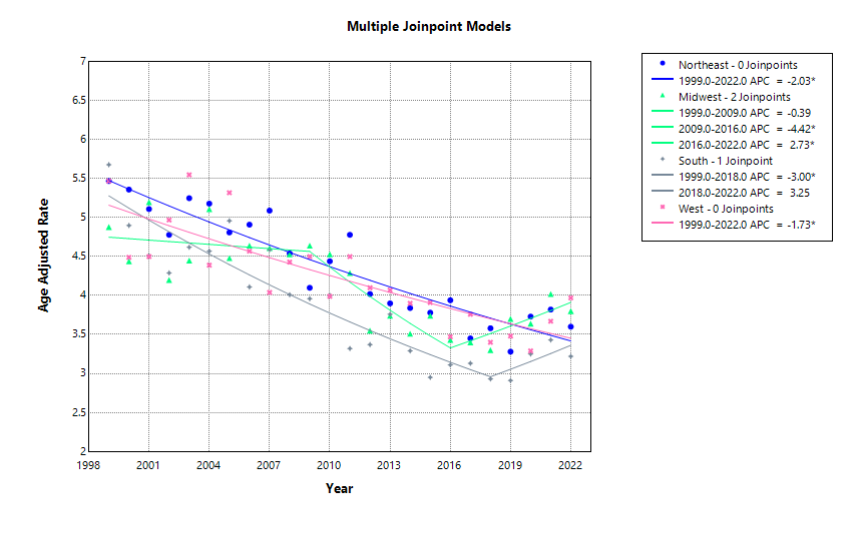

Supplement: Supplementary file 2 [file 8a03fb5db891a26790537185.docx]
