# Supplementary material for: Systemic Sclerosis and Cardiovascular Disease-related Mortality in the United States: An Analysis of Trends and Disparities, 1999-2022
Source: Research Square preprint supplement (doi:10.21203/rs.3.rs-7323176/v1), 2025-09-29
Supplement: Supplementary file 1 [file 6610679b9c24c554a7fc81d0.docx]

**Table 1.** Systemic Sclerosis and Cardiovascular Disease-related total number of deaths and AAMR in the US from 1999 to 2022, annual AAMRs for 1999 and 2022, and AAPC from 1999 to 2022. AAMR: Age-adjusted mortality rate; AAPC = Average annual percent change; 95% CI: 95 % Confidence interval; * = significantly different from 0 with p < 0.05

|  | Deaths, 1999 to 2022 (percentage, %) | AAMR, 1999 to 2022  (95% CI) | 1999 AAMR (95% CI) | 2022 AAMR (95% CI) | AAPC from 1999 to 2022 (95% CI) |
| --- | --- | --- | --- | --- | --- |
| Overall | 25965 | 4.02 (3.96 to 4.09) | 5.39 (5.08 to 5.70) | 3.58 (3.37 to 3.79) | -1.54* (-2.09 to -1.21) |
| Sex stratified |  |  |  |  |  |
| Male | 4811 (18.52) | 1.63 (1.57 to 1.69) | 2.17 (1.87 to 2.47) | 1.58 (1.38 to 1.79) | -1.74* (-2.42 to -1.19) |
| Female | 21154 (81.47) | 6.01 (5.91 to 6.11) | 7.99 (7.48 to 8.50) | 5.27 (4.92 to 5.61) | -1.46* (-2.07 to -1.07) |
| Race Stratified |  |  |  |  |  |
| NH Black or African American | 3909 (15.05) | 5.76 (5.53 to 5.99) | 8.04 (6.83 to 9.25) | 4.71 (3.97 to 5.46) | -2.44* (-3.07 to -1.82) |
| NH White | 18762 (72.25) | 3.76 (3.69 to 3.82) | 4.99 (4.66 to 5.32) | 3.40 (3.16 to 3.64) | -1.42* (-2.09 to -1.00) |
| Hispanic | 2408 (9.27) | 4.14 (3.92 to 4.36) | 6.88 (5.42 to 8.61) | 3.97 (3.3 to 4.64) | -1.74 (-3.53 to 0.12) |
| Census Region |  |  |  |  |  |
| Northeast | 5308 (20.44) | 4.31 (4.17 to 4.46) | 5.47 (4.78 to 6.16) | 3.60 (3.12 to 4.09) | -2.02* (-2.50 to -1.59) |
| Midwest | 5865 (22.58) | 4.12 (3.99 to 4.25) | 4.88 (4.27 to 5.49) | 3.80 (3.34 to 4.27) | -0.83* (-1.31 to -0.21) |
| South | 8950 (34.46) | 3.77 (3.68 to 3.87) | 5.68 (5.15 to 6.22) | 3.22 (2.90 to 3.54) | -1.94* (-2.71 to -1.36) |
| West | 5842 (22.49) | 4.16 (4.03 to 4.30) | 5.47 (4.77 to 6.16) | 3.97 (3.51 to 4.42) | -1.73* (-2.36 to -1.10) |
| Age Groups |  |  |  |  |  |
| Young (15-44) | 1715 (6.60) | 0.59 (0.56 to 0.63) | 0.78 (0.64 to 0.95) | 0.43 (0.32 to 0.57) | -2.42* (-3.35 to -1.60) |
| Middle Age (45-74) | 15588 (60.03) | 6.15 (6.03 to 6.27) | 9.19 (8.53 to 9.86) | 4.98 (4.59 to 5.37) | -2.33* (-3.15 to -1.77) |
| Elderly (≥75) | 8662 (33.36) | 18.70 (18.20 to 19.20) | 20.59 (18.40 to 22.79) | 19.68 (17.90 to 21.45) | -0.30 (-1.07 to -0.17) |
